# Supplementary material for: Performance of Winter-Sown Chickpea Breeding Lines with Contrasting Levels of Resistance to Ascochyta Blight
Source: MDPI journal article supplement (doi:10.3390/agronomy12092194), 2022-09-15
Supplement: s1 [file s1]

Archive with 1 entries (1 files):
- agronomy-1883342-supplementary.pdf
