# Supplementary material for: Performance of Winter-Sown Chickpea Breeding Lines with Contrasting Levels of Resistance to Ascochyta Blight
Source: MDPI journal article supplement (doi:10.3390/agronomy12092194), 2022-09-15
Supplement: s1 [file s1 › agronomy-1883342-supplementary.pdf]

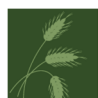

Article

# Agronomic Performance fo Winter-Sown Chickpea Breeding Lines with Contrasting Levels of Resistance to Ascochyta Blight

Diego Rubiales <sup>1,\*</sup>, Ana Moral <sup>1,†</sup> and Fernando Flores<sup>2</sup>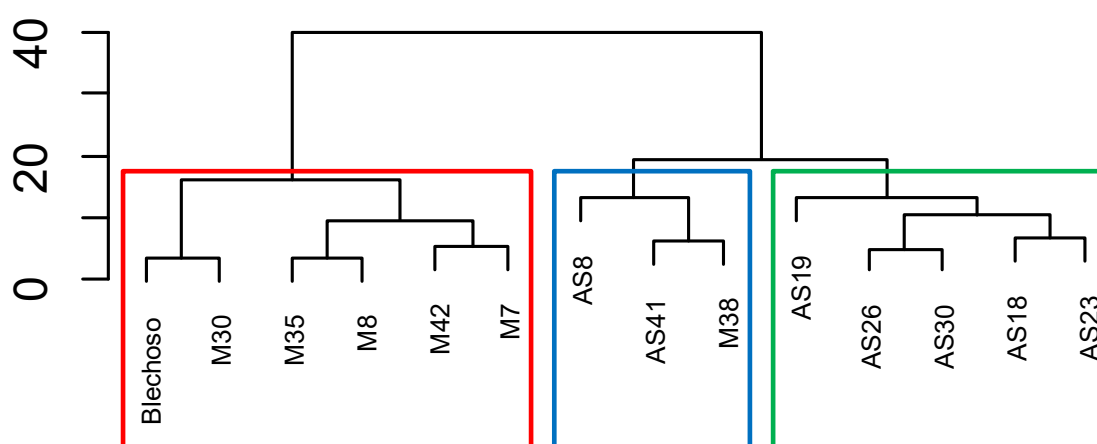

**Figure S1.** Dendrogram of the cluster analysis applied to the Euclidean distance of the ranks matrix in scenario from 50/50 to 0/100 for the WAASB/GY ratio, grouped by the Complete-linkage fusion technique.

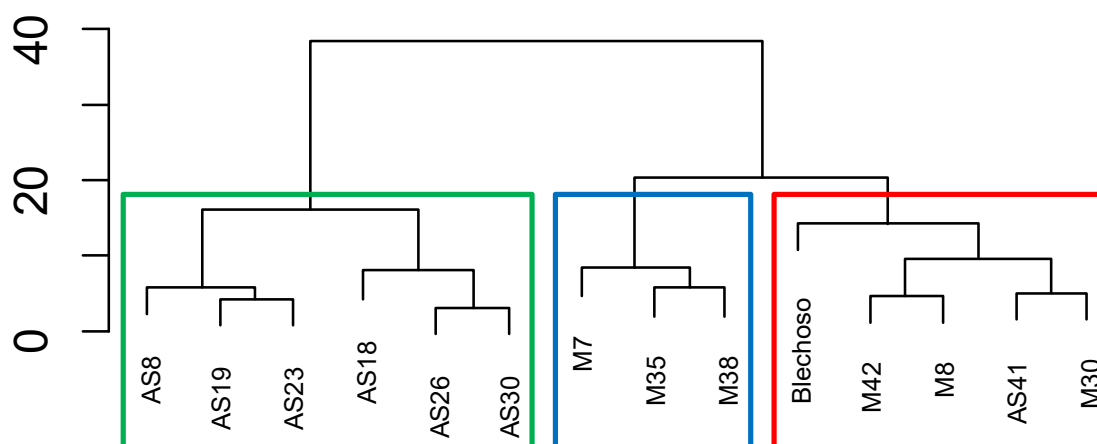

**Figure S2.** Dendrogram of the cluster analysis applied to the Euclidean distance of the ranks matrix in scenario from 50/50 to 0/100 for the WAASB/ascochyta blight (data transformed) ratio, grouped by the Complete-linkage fusion technique.
